# Supplementary material for: PPIP5K2 and PCSK1 are Candidate Genetic Contributors to Familial Keratoconus
Source: PubMed Central journal article supplement (PMC6920454; doi:10.1038/s41598-019-55866-5), 2019-12-18
Supplement: 41598_2019_55866_MOESM1_ESM.pdf [file 41598_2019_55866_MOESM1_ESM.pdf]

## ***PPIP5K2* and *PCSK1* are Candidate Genetic Contributors to Familial Keratoconus**

Mariam Lofty Khaled<sup>1,2#</sup>, Yelena Bykhovskaya<sup>3#</sup>, Chunfang Gu<sup>4</sup>, Alice Liu<sup>5</sup>, Michelle D. Drewry<sup>1</sup>, Zhong Chen<sup>1</sup>, Barbara A. Mysona<sup>1,6</sup>, Emily Parker<sup>1</sup>, Ryan P. McNabb<sup>5</sup>, Hongfang Yu<sup>1</sup>, Xiaowen Lu<sup>1</sup>, Jing Wang<sup>1</sup>, Xiaohui Li<sup>7</sup>, Abdulrahman Al-Muammar<sup>8</sup>, Jerome I. Rotter<sup>7</sup>, Louise F. Porter<sup>9</sup>, Amy Estes<sup>6, 10</sup>, Mitchell A. Watsky<sup>1,6</sup>, Sylvia B. Smith<sup>1,6,10</sup>, Hongyan Xu<sup>11</sup>, Khaled K. Abu-Amero<sup>8</sup>, Anthony Kuo<sup>5</sup>, Stephen B. Shears<sup>4</sup>, Yaron S. Rabinowitz<sup>3\$</sup>, Yutao Liu<sup>1,6,12\$</sup>

<sup>1</sup> Department of Cellular Biology and Anatomy, Augusta University, Augusta, GA, USA

<sup>2</sup> Department of Biochemistry, Faculty of Pharmacy, Cairo University, Egypt

<sup>3</sup> Department of Surgery and Regenerative Medicine Institute, Cedars-Sinai Medical Center, Los Angeles, CA, USA

<sup>4</sup> Inositol Signaling Group, Signal Transduction Laboratory, National Institute of Environmental Health Sciences, Research Triangle Park, NC, USA

<sup>5</sup> Department of Ophthalmology, Duke University Medical Center, Durham, NC, USA

<sup>6</sup> James and Jean Culver Vision Discovery Institute, Augusta University, Augusta, GA, USA

<sup>7</sup> Institute for Translational Genomics and Population Sciences, Los Angeles Biomedical Research Institute and Department of Pediatrics and Medicine at Harbor-UCLA, Torrance, CA, USA

<sup>8</sup> Department of Ophthalmology, Glaucoma Research Chair, King Saud University, Riyadh, Saudi Arabia

<sup>9</sup> Department of Eye and Vision Science, University of Liverpool, and St Paul's Eye Unit, Royal Liverpool Hospital, Liverpool, UK

<sup>10</sup> Department of Ophthalmology, Augusta University, Augusta, GA, USA

<sup>11</sup> Department of Population Health Science, Augusta University, Augusta, GA, USA

<sup>12</sup> Center for Biotechnology and Genomic Medicine, Augusta University, Augusta, GA, USA

The first two authors marked with # are considered to have contributed to this study equally.

The final two authors marked with \$ are considered to have supervised this study equally.

**Corresponding author:**

Yaron S. Rabinowitz

Cornea Genetic Eye Institute

50 N. La Cienega Boulevard Suite #340

Beverly Hills, CA 90211, USA

Email: [aron.rabinowitz@cshs.org](mailto:aron.rabinowitz@cshs.org)

or

Yutao Liu

1460 Laney Walker Blvd CB1101

Augusta, GA 30912, USA

Phone: 1-706-721-2015

Fax: 1-706-721-2015

Email: [yutliu@augusta.edu](mailto:yutliu@augusta.edu)

**Supplemental Figure 1. Alignment of the amino acid Serine 419 of human PPIP5K2 protein across 100 vertebrates.** The amino acid S419 was highlighted in yellow. The figure indicates the relatively high conservation across all vertebrates.

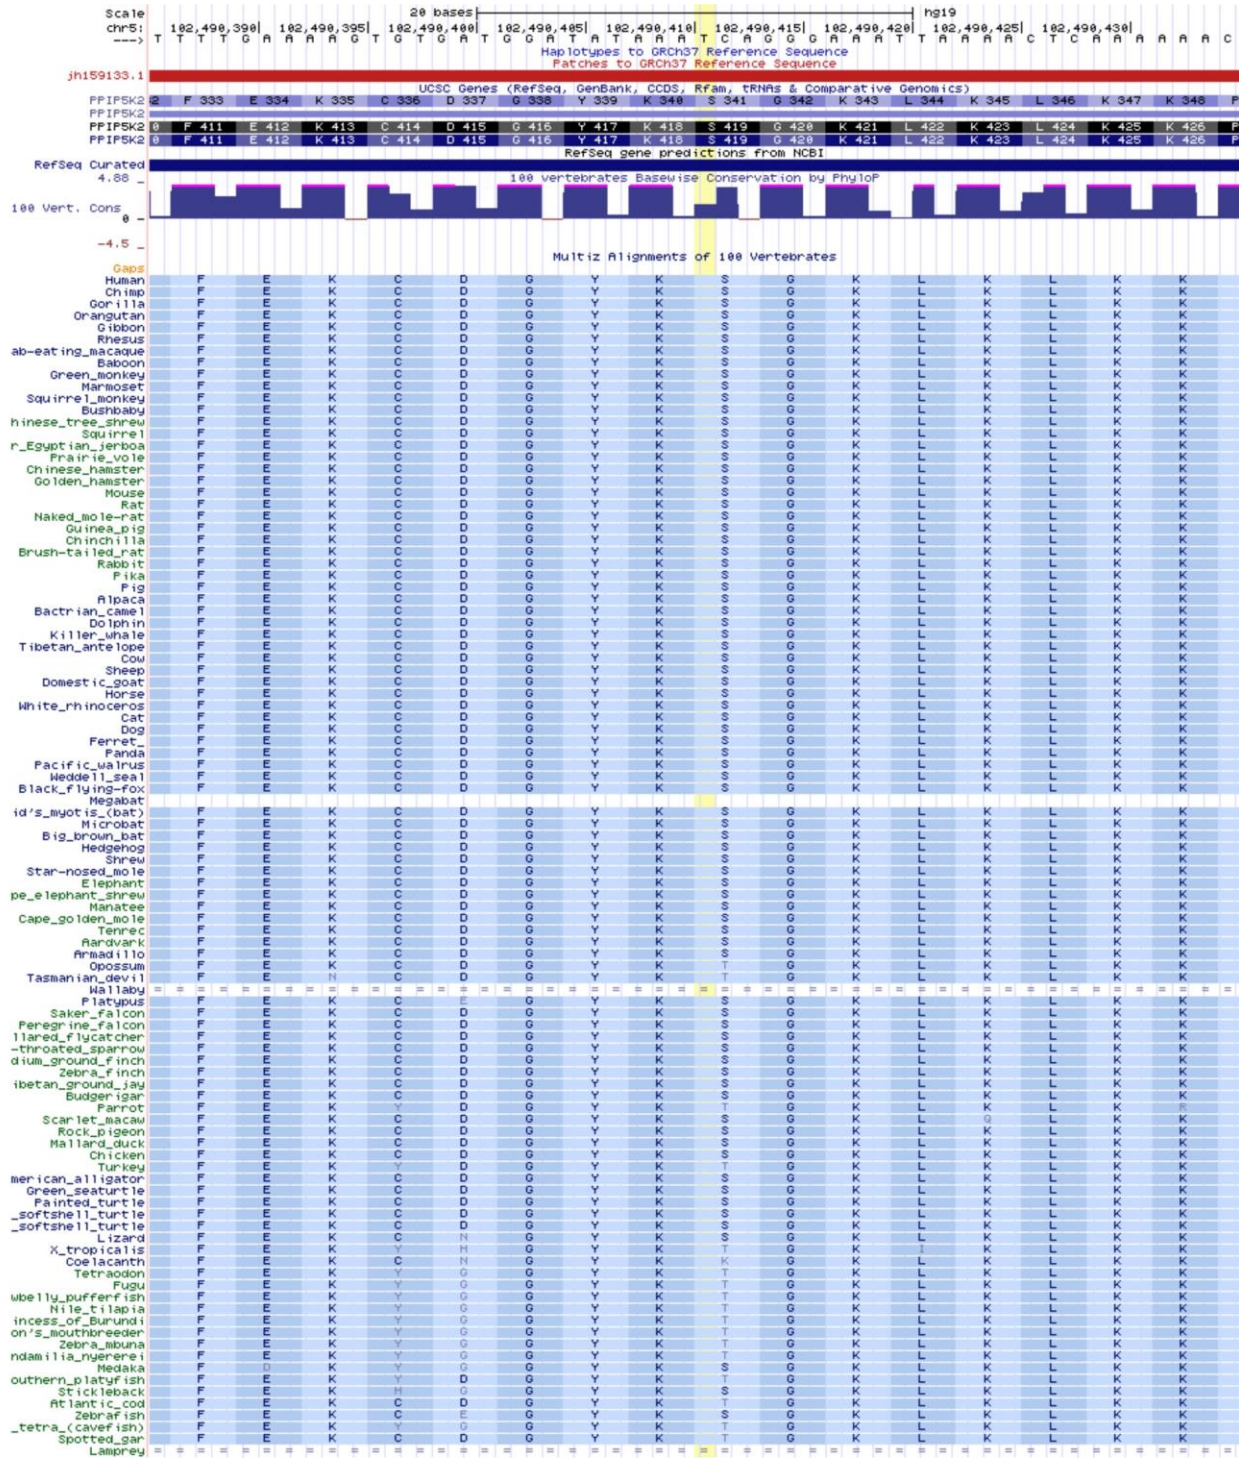

**Supplemental Figure 2. Alignment of the nucleotide within the *PCSK1* gene (rs373951075, c.1096-10G>A) across 100 vertebrates. This specific nucleotide was highlighted in yellow. This figure indicates that this nucleotide is not well conserved across all the vertebrates.**

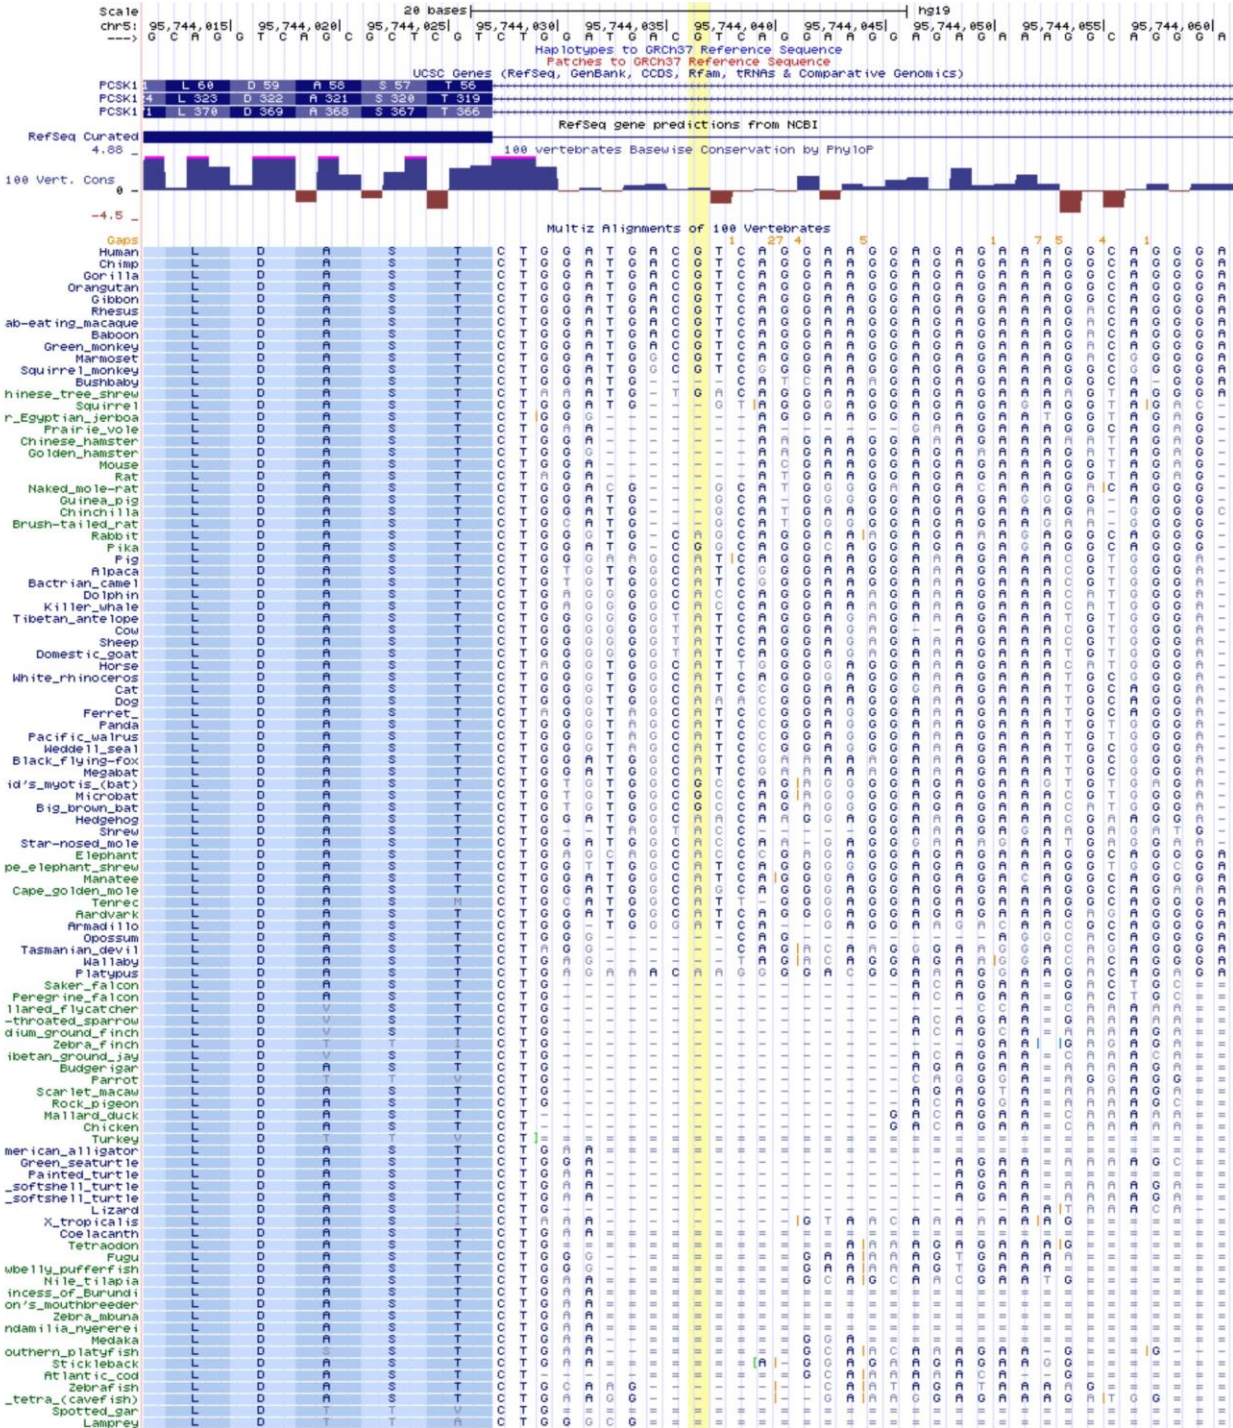

**Supplemental Figure 3. Alignment of the amino acid N843 of human PPIP5K2 protein across 100 vertebrates. The amino acid N843 was highlighted in yellow. This amino acid is relatively highly conserved across all the vertebrates with either N or D amino acid.**

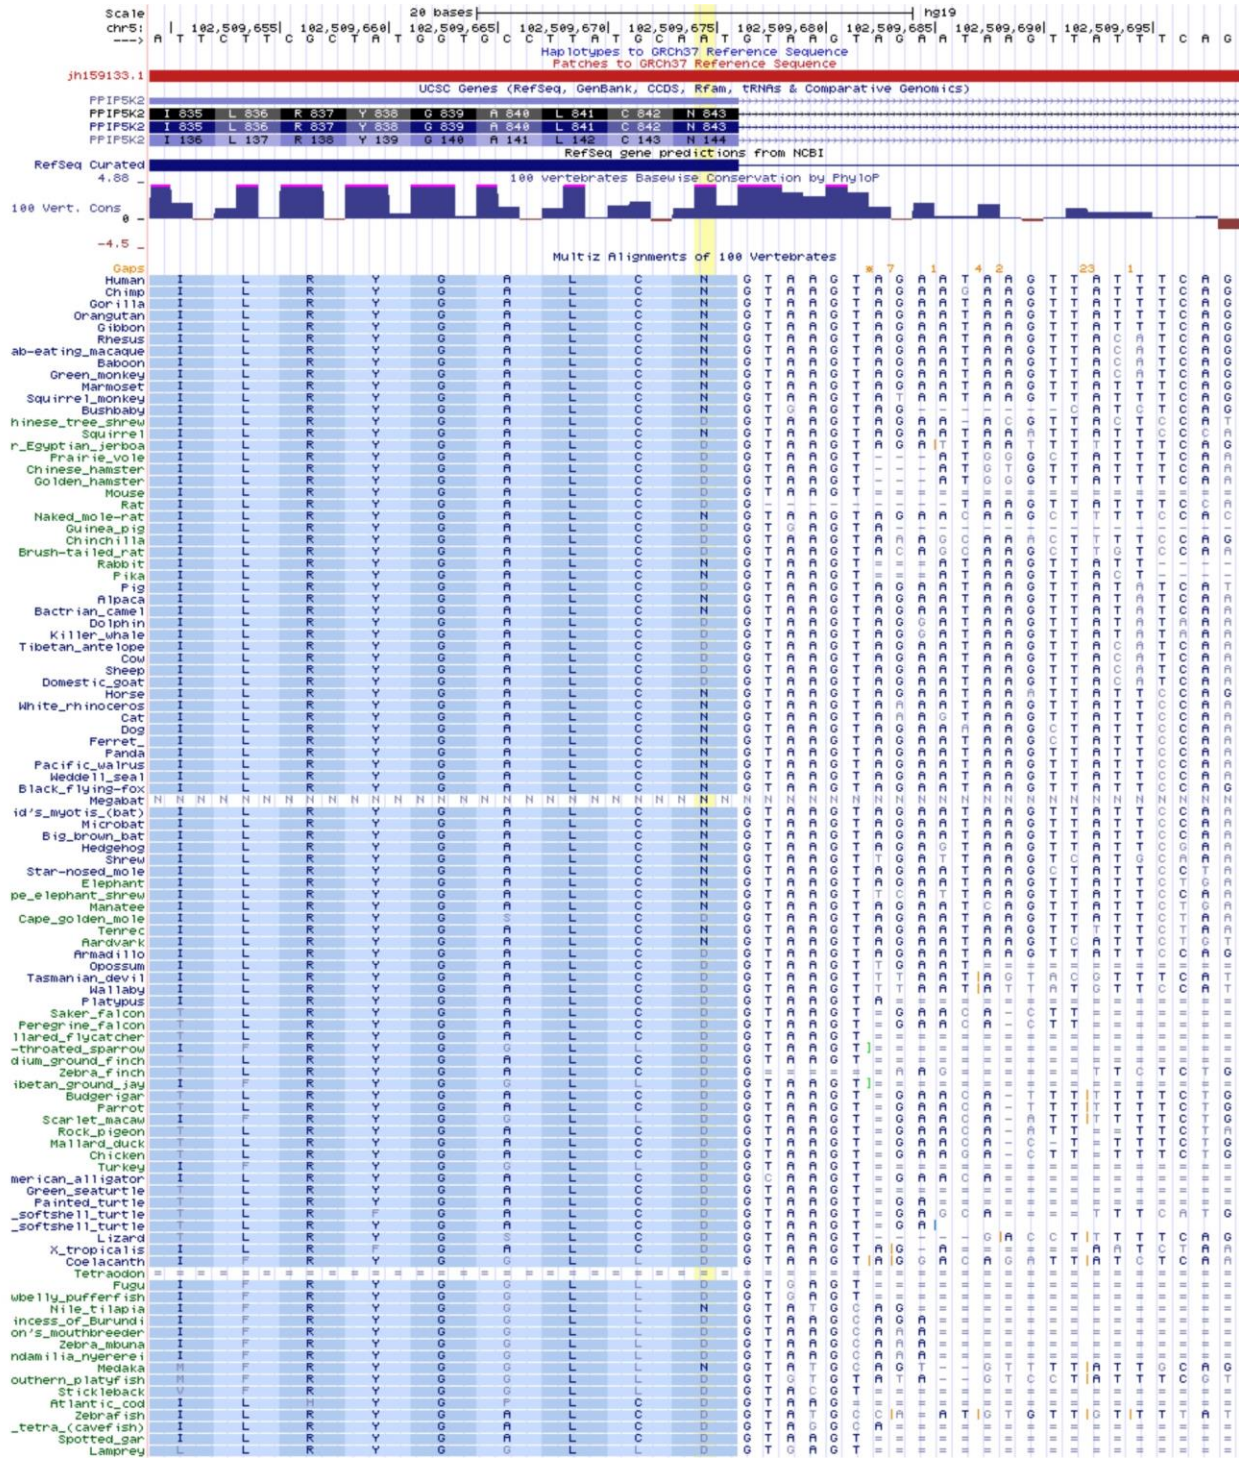

**Supplemental Figure 4. Bioinformatics pipeline to filter variants derived from whole exome sequencing with 10 family members.**

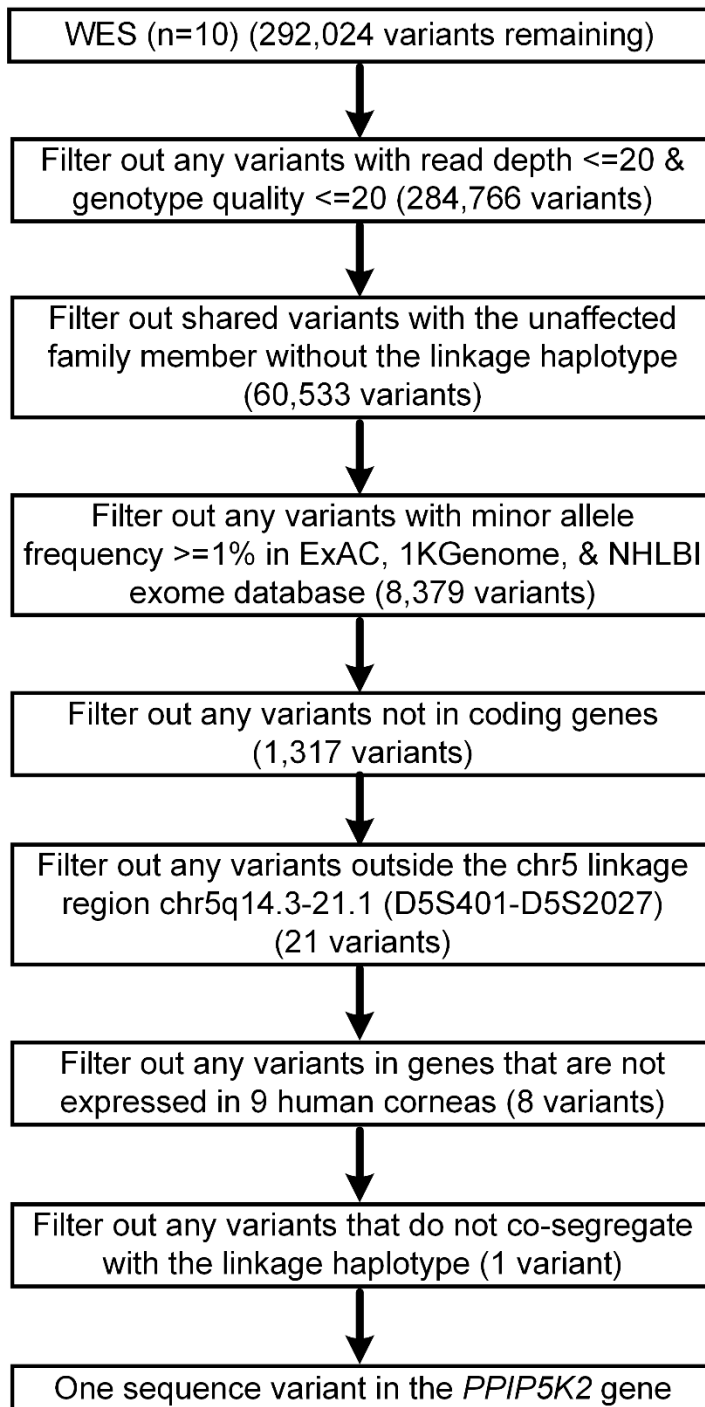

**Supplemental Figure 5. Variant filtering pipeline designed for analyzing the whole genome sequencing data.**

|                                                      | <b>CA1 (KC)</b>                                                            | <b>CA2 (KC)</b> | <b>CA3 (KC)</b> | <b>CA5 (KC)</b> | <b>CA4<br/>(unaffected)</b> |
|------------------------------------------------------|----------------------------------------------------------------------------|-----------------|-----------------|-----------------|-----------------------------|
| # Variants after WGS                                 | 4,443,805                                                                  | 4,440,245       | 4,459,147       | 4,426,786       | 4,450,888                   |
| # Variants on Chr5                                   | 272,142                                                                    | 269,330         | 268,972         | 262,322         | 266,347                     |
| High quality and Read Depth                          | 229,220                                                                    | 238,471         | 229,910         | 233,029         | 213,344                     |
| # Variants shared between CA1 & CA2                  | 174,609                                                                    |                 |                 |                 |                             |
| # Variants shared between CA1 & CA2 & CA3            | 121,345                                                                    |                 |                 |                 |                             |
| # Variants shared between CA1 & CA2 & CA3 & CA5      | 99,161                                                                     |                 |                 |                 |                             |
| # Variants with MAF < 1%                             |                                                                            |                 |                 | 11,993          |                             |
| # Variants in coding region                          |                                                                            |                 |                 | 2,127           |                             |
| # Variants not shared with CA4 (control)             |                                                                            |                 |                 | 679             |                             |
| # Variants in the linkage region                     |                                                                            |                 |                 | 135             |                             |
| # Variants co-segregating with the linkage haplotype | 1 <i>PCSK1</i> intronic variant in the main branch of this family          |                 |                 |                 |                             |
|                                                      | <i>PP1P5K2</i> missense variant was immediately outside the linkage region |                 |                 |                 |                             |

**Supplemental Table 1. List of individuals with their clinical phenotypes and genotypes in the four-generation keratoconus family**

| ID   | Family ID | Individual ID | Father ID | Mother ID | Sex | Affection status | Grey haplotype | Genotype for PPIP5K2 c.1255 | Genotype for PCSK1 c.1096-10 |
|------|-----------|---------------|-----------|-----------|-----|------------------|----------------|-----------------------------|------------------------------|
| KC1  | II-4      | 206           | 101       | 102       | 2   | 2                | YES            | T/G                         | G/A                          |
| KC2  | II-5      | 202           | 101       | 102       | 1   | 2                | YES            | T/G                         | G/A                          |
| KC3  | II-6      | 216           | 0         | 0         | 2   | 1                | NO             | T/T                         | G/G                          |
| KC4  | III-2     | 302           | 201       | 202       | 2   | 2                | NO             | T/T                         | G/G                          |
| KC5  | III-5     | 311           | 205       | 206       | 1   | 2                | YES            | T/G                         | G/A                          |
| KC6  | III-6     | 318           | 0         | 0         | 1   | 1                | NO             | T/T                         | G/G                          |
| KC7  | III-7     | 301           | 205       | 206       | 2   | 2                | YES            | T/G                         | G/A                          |
| KC8  | III-8     | 321           | 0         | 0         | 1   | 1                | NO             | T/T                         | G/G                          |
| KC9  | III-9     | 310           | 205       | 206       | 2   | 2                | YES            | T/T                         | G/A                          |
| KC10 | III-10    | 303           | 202       | 216       | 1   | 1                | YES            | T/G                         | G/A                          |
| KC11 | III-11    | 304           | 0         | 0         | 2   | 1                | NO             | T/T                         | G/G                          |
| KC12 | III-12    | 305           | 202       | 216       | 2   | 1                | YES            | T/G                         | G/A                          |
| KC13 | III-13    | 343           | 0         | 0         | 1   | 1                | NO             | T/T                         | G/G                          |
| KC14 | III-14    | 317           | 202       | 216       | 1   | 2                | YES            | T/G                         | G/A                          |
| KC15 | IV-1      | 403           | 303       | 302       | 1   | 1                | NO             | T/T                         | G/G                          |
| KC16 | IV-2      | 401-400       | 304       | 301       | 1   | 2                | NO             | T/T                         | G/G                          |
| KC17 | IV-3      | 418           | 311       | 320       | 1   | 1                | YES            | T/G                         | G/A                          |
| KC18 | IV-4      | 423           | 311       | 320       | 2   | 2                | NO             | T/T                         | G/G                          |
| KC19 | IV-5      | 422           | 311       | 320       | 1   | 2                | YES            | T/G                         | G/A                          |
| KC20 | IV-6      | 440           | 311       | 320       | 1   | 2                | NO             | T/T                         | G/G                          |
| KC21 | IV-7      | 409           | 318       | 301       | 2   | 1                | YES            | T/G                         | G/A                          |
| KC22 | IV-8      | 401           | 321       | 310       | 2   | 1                | NO             | T/T                         | G/G                          |
| KC23 | IV-9      | 425           | 321       | 310       | 2   | 1                | YES            | T/T                         | G/A                          |
| KC24 | IV-10     | 404           | 303       | 304       | 1   | 2                | YES            | T/G                         | G/A                          |
| KC25 | IV-11     | 408           | 303       | 304       | 2   | 1                | NO             | T/T                         | G/G                          |
| KC26 | IV-12     | 419           | 343       | 305       | 1   | 2                | YES            | T/G                         | G/A                          |

Note: Sex 1 for male and 2 for female; Affection status 1 for unaffected and 2 for affected with keratoconus; KC for keratoconus.



**Supplemental Table 2. List of individuals with their clinical phenotype and genotypes in the second keratoconus family**

| ID      | Family ID | Individual ID | Father ID | Mother ID | Sex | Affection status | PPIP5K2 c.2528A>G |
|---------|-----------|---------------|-----------|-----------|-----|------------------|-------------------|
| US-KC1  | 914       | 201           | unknown   | unknown   | 2   | 1                | A/G               |
| US-KC2  | 914       | 202           | unknown   | unknown   | 1   | 1                | A/G               |
| US-KC3  | 914       | 301           | 202       | 201       | 1   | 2                | A/G               |
| US-KC4  | 914       | 302           | 202       | 201       | 2   | 1                | A/G               |
| US-KC5  | 914       | 303           | 202       | 201       | 2   | 2                | A/G               |
| US-KC6  | 914       | 304           | 202       | 201       | 1   | 1                | A/G               |
| US-KC7  | 914       | 305           | 202       | 201       | 1   | 1                | A/G               |
| US-KC8  | 914       | 306           | 202       | 201       | 2   | 1                | A/A               |
| US-KC9  | 914       | 307           | 202       | 201       | 2   | 1                | A/A               |
| US-KC10 | 914       | 308           | 202       | 201       | 2   | 1                | A/A               |

Note: Sex 1 for male and 2 for female; Affection status 1 for unaffected and 2 for affected with keratoconus; KC for keratoconus.
